# Supplementary material for: Green water availability and water-limited crop yields under a changing climate in Ethiopia
Source: Copernicus journal article supplement (doi:10.5194/hess-2024-37), 2024-02-20
Supplement: Supplementary file 1 [file hess-2024-37-supplement.pdf]

# **Green water availability and water-limited crop yields under a changing climate in Ethiopia**

**Mosisa Tujuba Wakjira<sup>1</sup>, Nadav Peleg<sup>2</sup>, Johan Six<sup>3</sup>, Peter Molnar<sup>1</sup>**

<sup>1</sup>Institute of Environmental Engineering, ETH Zurich, Stefano-Franscini-Platz 5, CH-8093 Zürich, Switzerland

<sup>2</sup>Institute of Earth Surface Dynamics, University of Lausanne, CH-1015 Lausanne, Switzerland

<sup>3</sup>Institute of Agricultural Science, ETH Zurich, Universitätstrasse 2, CH-8092 Zürich, Switzerland

*Correspondence to:* Mosisa Tujuba Wakjira ([wakjira@ifu.baug.ethz.ch](mailto:wakjira@ifu.baug.ethz.ch); [mosisatujuba@gmail.com](mailto:mosisatujuba@gmail.com))

Table S1: List of the administrative zones within the nine regional states of Ethiopia based on pre-2010 divisions. The short names are arbitrary designations used in Fig. 1.

| Short name | Long name         | Region | Short name      | Long name      | Region           |
|------------|-------------------|--------|-----------------|----------------|------------------|
| NWT        | North West Tigray | Tigray | SHI             | Shinile        | Somali           |
| CTI        | Central Tigray    |        | FAF             | Fafan          |                  |
| ETI        | Eastern Tigray    |        | LIB             | Liben          |                  |
| STI        | Southern Tigray   |        | AFD             | Afder          |                  |
| WTI        | Western Tigray    |        | DOL             | Dolo           |                  |
| ZO1        | Zone 1            | Afar   | JAR             | Jarar          |                  |
| ZO2        | Zone 2            |        | SHB             | Shabelle       |                  |
| ZO3        | Zone 3            |        | KOR             | Korahe         |                  |
| ZO4        | Zone 4            |        | SIT             | Siti           |                  |
| ZO5        | Zone 5            |        | NOG             | Nogob          |                  |
| NGO        | North Gondar      | Amhara | MET             | Metekel        | Benishangul-gumz |
| SGO        | South Gondar      |        | ASO             | Asosa          |                  |
| NWO        | North Wello       |        | KEM             | Kemashi        |                  |
| SWO        | South Wello       |        | GUR             | Gurage         | SNNPR            |
| aNSH       | North Shewa       |        | HAD             | Hadiya         |                  |
| EGO        | East Gojam        |        | KET             | Kembata Tibaro |                  |
| WGO        | West Gojam        |        | KEF             | Kefa           |                  |
| WAG        | Wag Himra         |        | GGO             | Gamo Gofa      |                  |
| AWI        | Awi               |        | BMJ             | Bench Maji     |                  |
| ORO        | Oromia            |        | YEM             | Yem Special    |                  |
| WWL        | West Wellega      | AMA    | Amaro Special   |                |                  |
| EWL        | East Wellega      | BUR    | Burji Special   |                |                  |
| ILU        | Ilu Aba Bora      | KONs   | Konso Speical   |                |                  |
| JIM        | Jimma             | DER    | Derashe Special |                |                  |
| WSH        | West Shewa        | DAW    | Dawuro          |                |                  |
| oNSH       | North Shewa       | BAS    | Basketo Special |                |                  |
| ESH        | East Shewa        | KON    | Konta Special   |                |                  |
| ARS        | Arsi              | SIL    | Siltie          |                |                  |
| WHA        | West Hararge      | ALB    | Alaba Special   |                |                  |
| EHA        | East Hararge      | ALL    | Alle            |                |                  |
| BAL        | Bale              | WOL    | Wolaita         |                |                  |
| BOR        | Borena            | SOM    | South Omo       | Sidama         |                  |
| SWS        | South West Shewa  | SID    | Sidama          | Gambela        |                  |
| GUJ        | Guji              | AGN    | Agnuak          |                |                  |
| wARS       | West Arsi         | MAJ    | Majang          |                |                  |
|            |                   |        | NUE             | Nuer           |                  |

Table S2: List of the CMIP6 model projections used for the projection of the precipitation, maximum and minimum temperature and incoming shortwave radiation over Ethiopia. The 'x' marks show the variables that were used from the indicated model.

| Model            | Institution (country/region) <sup>1</sup> | Precip | Tmax | Tmin | Rsw | Reference                  |
|------------------|-------------------------------------------|--------|------|------|-----|----------------------------|
| ACCESS-CM2       | CSIRO (Australia)                         | x      | x    | x    | x   | (Bi et al., 2020)          |
| AWI-CM-1-1-MR    | AWI (Germany)                             | x      | x    | x    | x   | (Semmler et al., 2020)     |
| BCC-CSM2-MR      | BCC (Asia)                                | x      |      |      | x   | (Wu et al., 2019)          |
| CAMS-CSM1-0      | CAMS (China)                              | x      |      |      | x   | (Rong et al., 2019)        |
| CanESM5-CanOE    | CCCma (Canada)                            | x      | x    | x    | x   | (Christian et al., 2022)   |
| CESM2            | NCAR (USA)                                | x      |      |      | x   | (Danabasoglu et al., 2020) |
| CIESM            | THU (China)                               |        | x    | x    |     | (Lin et al., 2020)         |
| CMCC-CM2-SR5     | CMCC (Italy)                              | x      |      |      | x   | (Cherchi et al., 2019)     |
| CMCC-ESM2        |                                           | x      | x    | x    | x   | (Lovato et al., 2022)      |
| CNRM-CM6-1       | CNRM (France)                             | x      | x    | x    | x   | (Voldoire et al., 2019)    |
| CNRM-CM6-1-HR    |                                           | x      | x    | x    | x   |                            |
| CNRM-ESM2-1      |                                           | x      | x    | x    | x   |                            |
| EC-Earth3-Veg-LR | EC-Earth (Europe)                         |        | x    | x    |     | (Döscher et al., 2022)     |
| FGOALS-g3        | CAS (China)                               | x      | x    | x    | x   | (Li et al., 2020)          |
| FIO-ESM-2-0      | FIO-QNLM (China)                          | x      | x    | x    | x   | (Bao et al., 2020)         |
| GFDL-ESM4        | NOAA-GFDL (USA)                           | x      | x    | x    | x   | (Dunne et al., 2020)       |
| HadGEM3-GC31-LL  | MOHC (UK)                                 | x      | x    | x    | x   | (Andrews et al., 2020)     |
| IITM-ESM         | CCCR-IITM (India)                         | x      | x    | x    | x   | (David A. et al., 2019)    |
| INM-CM4-8        | INM (Russia)                              |        | x    | x    |     | (Volodin et al., 2018)     |
| INM-CM5-0        |                                           | x      | x    | x    | x   |                            |
| IPSL-CM6A-LR     | IPSL (France)                             | x      | x    | x    | x   | (Boucher et al., 2020)     |
| MIROC6           | MIROC (Japan)                             | x      | x    | x    | x   | (Tatebe et al., 2019)      |
| MIROC-ES2L       |                                           | x      | x    | x    | x   | (Hajima et al., 2020)      |
| MPI-ESM1-2-LR    | MPI (Germany)                             | x      | x    | x    | x   | (Gutjahr et al., 2019)     |
| NESM3            | NUIST (China)                             | x      |      |      | x   | (Cao et al., 2018)         |
| NorESM2-MM       | NCC (Norway)                              | x      |      |      | x   | (Seland et al., 2020)      |
| TaiESM1          | AS-RCEC (Taiwan)                          | x      |      |      | x   | (Wang et al., 2021)        |
| UKESM1-0-LL      | MOHC (UK)                                 | x      | x    | x    | x   | (Sellar et al., 2019)      |

<sup>1</sup> The full names of the institutions can be found in (IPCC, 2021)

Table S3: List of the nine surface runoff measurement sites and measurement periods collected from published literature for the validation of the simulated surface runoff.

| Measurement site | Lat (° N) | Lon (° E) | Measurement periods<br>(Values used in the evaluation) | Reference                                               |
|------------------|-----------|-----------|--------------------------------------------------------|---------------------------------------------------------|
| Maybar           | 11.02     | 39.67     | 1982-1993 (mean)                                       | (Herweg and Ludi, 1999;<br>Herweg and Stillhardt, 1999) |
| Hunde lafto      | 9.07      | 41.00     | 1983-1993 (mean)                                       |                                                         |
| Andit Tid        | 9.80      | 39.72     | 1982-1992 (mean)                                       |                                                         |
| Anjeni           | 10.81     | 37.57     | 1985-1993 (mean)                                       |                                                         |
| Gununo           | 6.92      | 37.65     | 1982-1992 (mean)                                       |                                                         |
| Dendi            | 9.13      | 37.12     | 2007-2009 (annual)                                     | (Adimassu et al., 2014)                                 |
| Holeta           | 9.07      | 38.48     | 2009-2010 (annual)                                     | (Adimassu et al., 2019)                                 |
| Debre Mawi       | 11.33     | 37.43     | 2008-2009 (annual)                                     | (Amare et al., 2014)                                    |
| Chefe donsa      | 8.96      | 39.11     | 2001-2002 (annual)                                     | (Erkossa et al., 2006)                                  |
| Dera             | 8.36      | 39.34     | 2004 (annual)                                          | (Welderufael et al., 2008)                              |
| Yeku             | 12.52     | 39.07     | 2003 (annual)                                          | (Collick et al., 2009)                                  |
| Guder*           | 9.84      | 36.67     | 2003 (annual)                                          | (Tumsa et al., 2022)                                    |
| Dodota*          | 11.50     | 39.92     | 1994-2000 (mean)                                       | (Teso et al., 2010)                                     |
| Keleta           | 8.12      | 39.46     | 1981, 1990 (annual)                                    | (Tibebe and Bewket, 2011)                               |
| Suluh*           | 13.80     | 39.50     | 1992-2003 (mean)                                       | (Abebe, 2014)                                           |
| Hare*            | 6.25      | 37.55     | 1990-1999 (mean)                                       | (Wagesho et al., 2013)                                  |
| Bilate*          | 7.50      | 37.94     | 1990-1999 (mean)                                       |                                                         |

\*These are model-calibrated surface runoff data: Guder (SWAT+), Dodota (SWAT), Suluh (HEC-HMS), Hare and Bilate (SWAT)

Table S4: Published potential (fully irrigated, optimally fertilized) yield measured at 14 experimental sites across the RFA region of Ethiopia.

| Experimental site           | Potential yield,<br>Yp (ton/ha) | Lat (° N) | Lon (° E) | Reference                           |
|-----------------------------|---------------------------------|-----------|-----------|-------------------------------------|
| Salaklaka, Northwest Tigray | 7.3                             | 14.3      | 38.72     | (Gebreigziabher, 2020)              |
| Melkasa, East Shoa          | 7.9                             | 8.4       | 39.35     | (Seid, Mulugeta M; Narayanan, 2015) |
| Boloso Sore, Wolayta        | 8.8                             | 7.0       | 37.75     | (Chinasho et al., 2023)             |
| Tepi, SW Ethiopia           | 6.8                             | 7.187     | 35.42     | (Zelege, 2020)                      |
| Raya, South Tigray          | 8.7                             | 12.7      | 39.7      | (Mehari et al., 2020)               |
| Arba Minch, Gamo Gofa       | 8.0                             | 6.08      | 37.58     | (Setu et al., 2023)                 |
| Koga, West Gojam            | 5.9                             | 11.37     | 37.12     | (Abiyu and Alamirew, 2015)          |
| Haru ARC, West Wollega      | 8.4                             | 8.90      | 35.87     | (Admasu et al., 2017)               |
| Adami Tulu, East Shoa       | 4.5                             | 7.75      | 38.65     | (Furgassa, 2017)                    |
| Mehoni, South Tigray        | 5.7                             | 12.87     | 39.64     | (Mebratu and Mehamed, 2019)         |
| Haramaya, East Hararge      | 7.1                             | 9.417     | 42.04     | (Mengiste and Tilahun, 2009)        |
| Hawassa, Sidama             | 9.0                             | 7         | 38        | (Jemal and Berhanu, 2020)           |
| Koka, East Shoa             | 6.3                             | 8.43      | 39        | (Meskelu et al., 2018)              |
| Gumselasa, South Tigray     | 9.9                             | 13.25     | 39.51     | (Mintesinot et al., 2004)           |

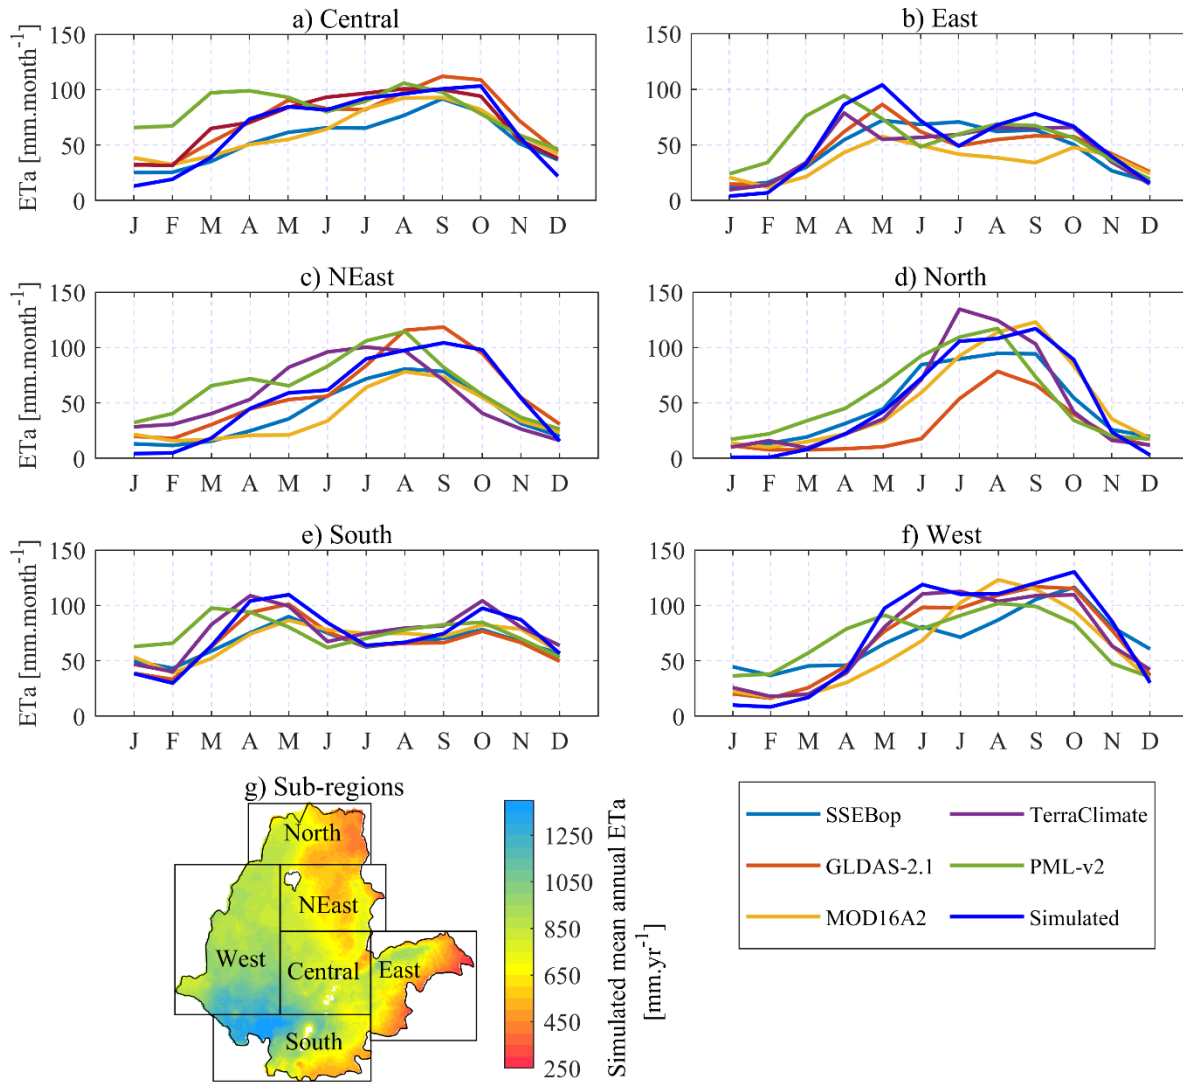

Figure S1: Comparison of area-averaged monthly cycles of the simulated ETa and other independent ETa products (a-f) at six arbitrarily defined sub-regions (g) for the record period 2003-2010.

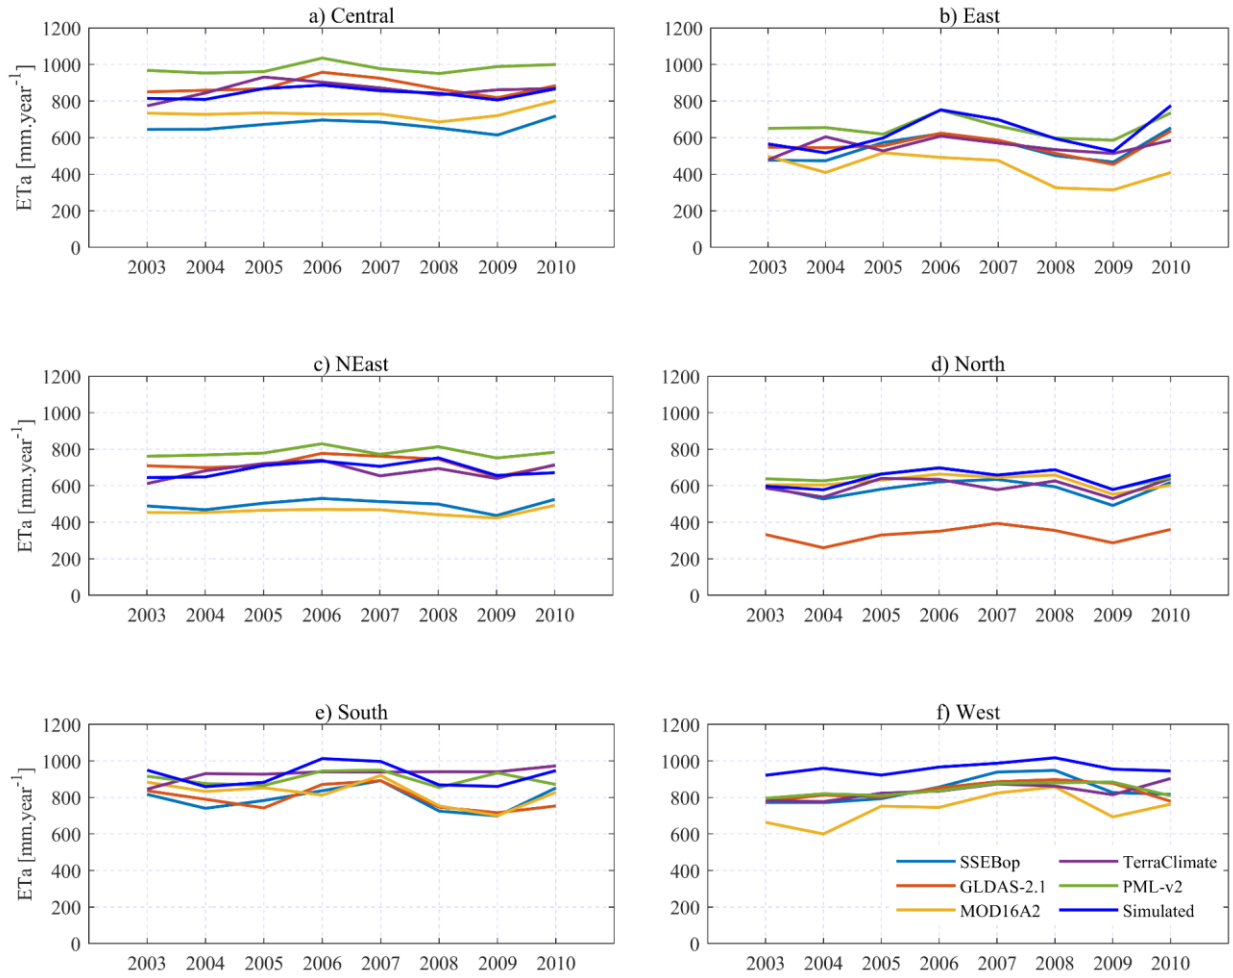

Figure S2: Comparison of simulated and independent (observed) annual ETa (a-f) at the six sub-regions (see Fig. S1g) for the record period 2003-2010.

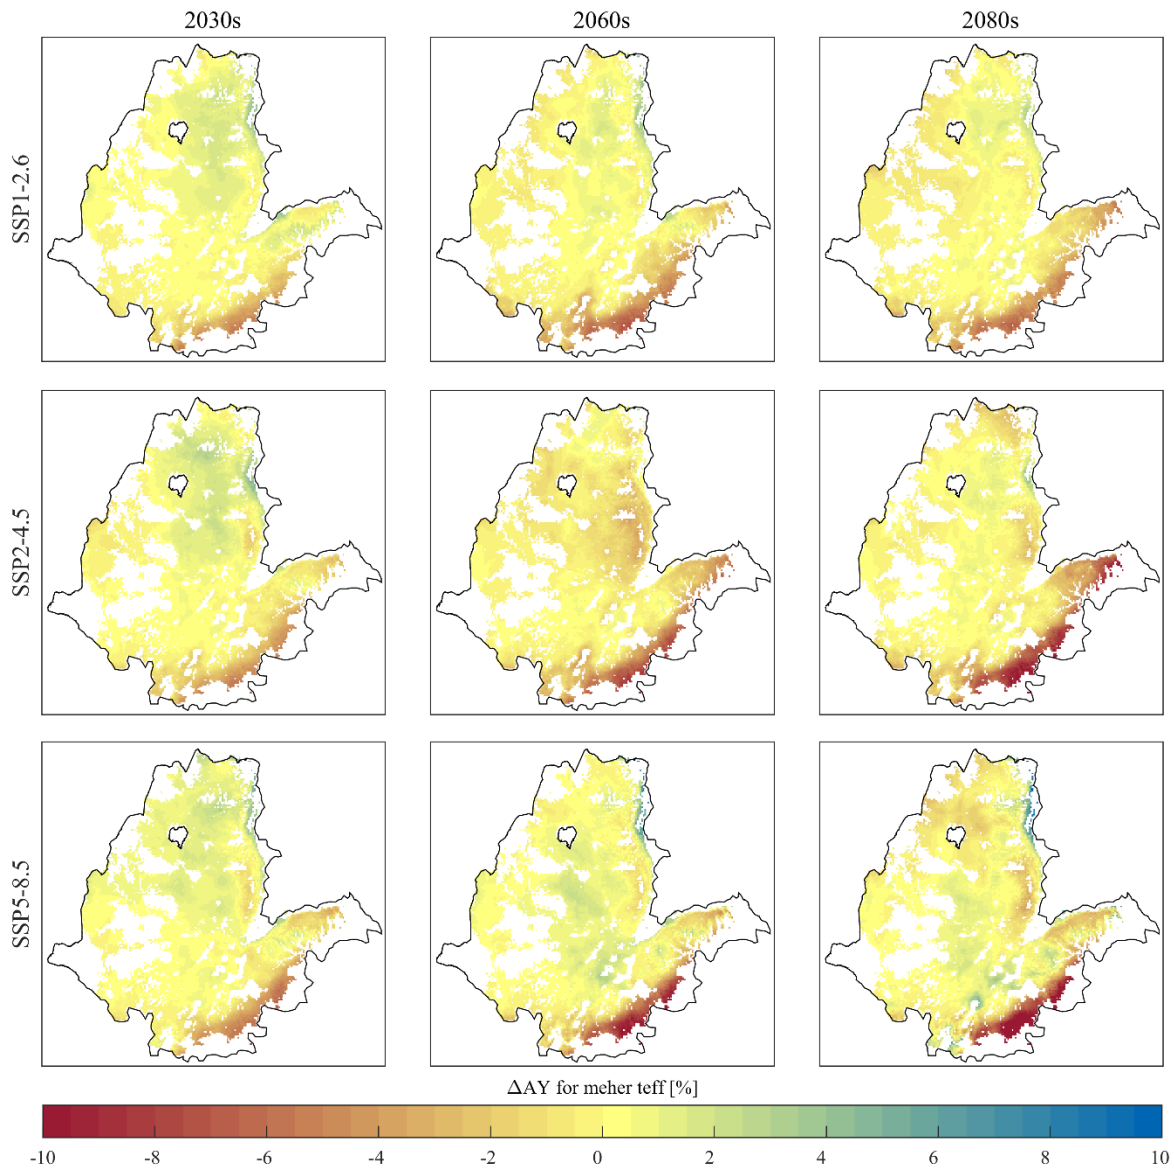

Figure S3: Projected changes in Meher water-limited attainable yield (AY) for teff under the SSP1-2.6, SSP2-4.5, and SSP5-8.5. The RFA region was masked using cropland suitability maps (Wakjira et al., under review) to restrict the analysis to areas potentially suitable for each crop. The non-producing areas during both seasons were also masked out following the Atlas of Ethiopian Rural Socioeconomy (IFPRI and CSA, 2006).

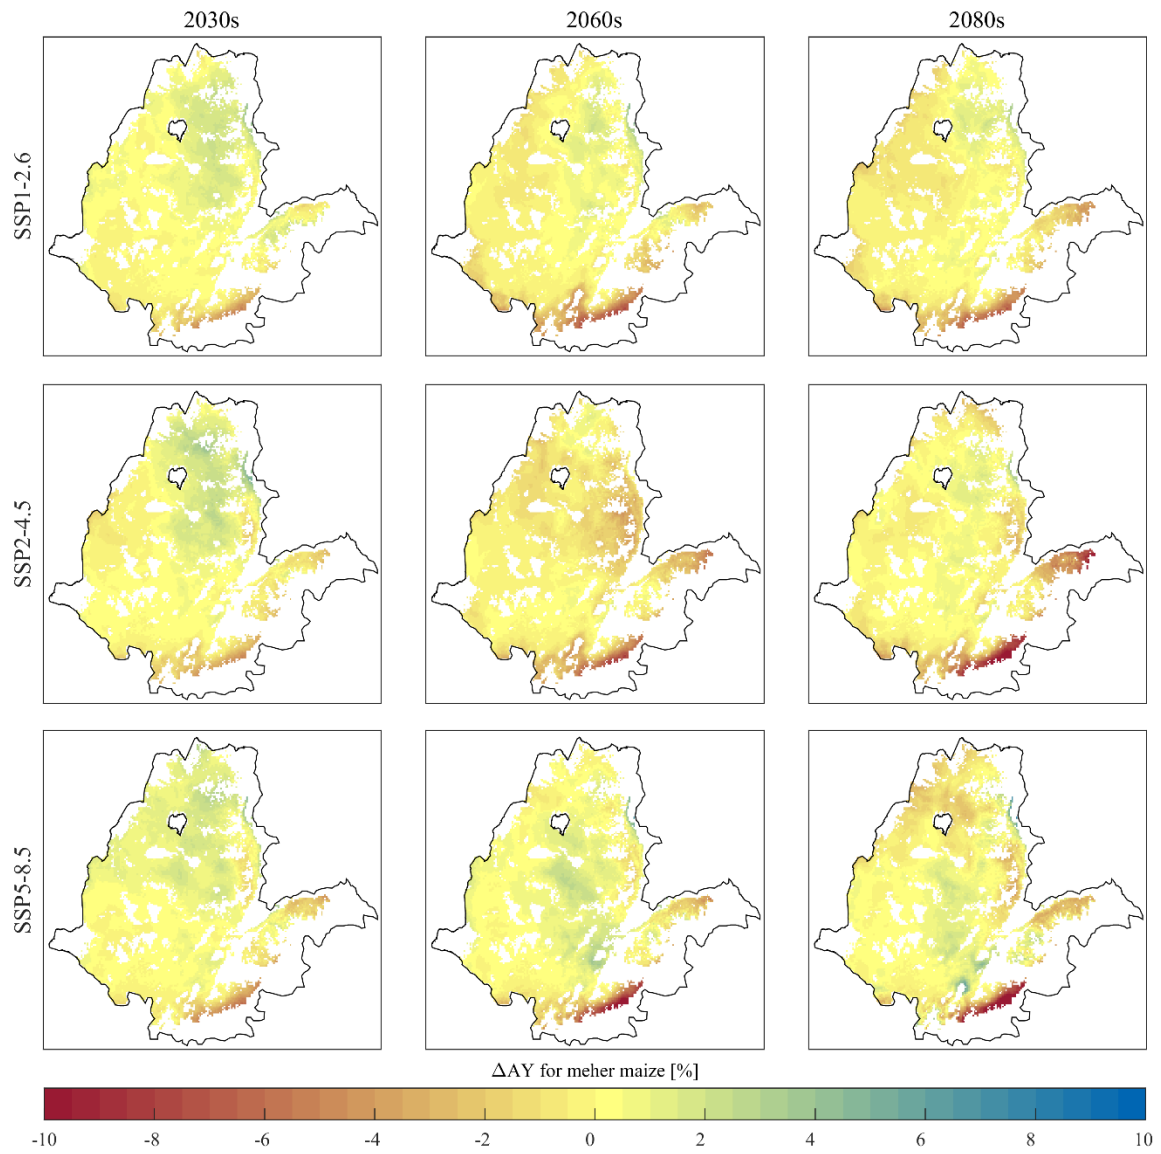

Figure S4: The same as Fig. S3, but for maize



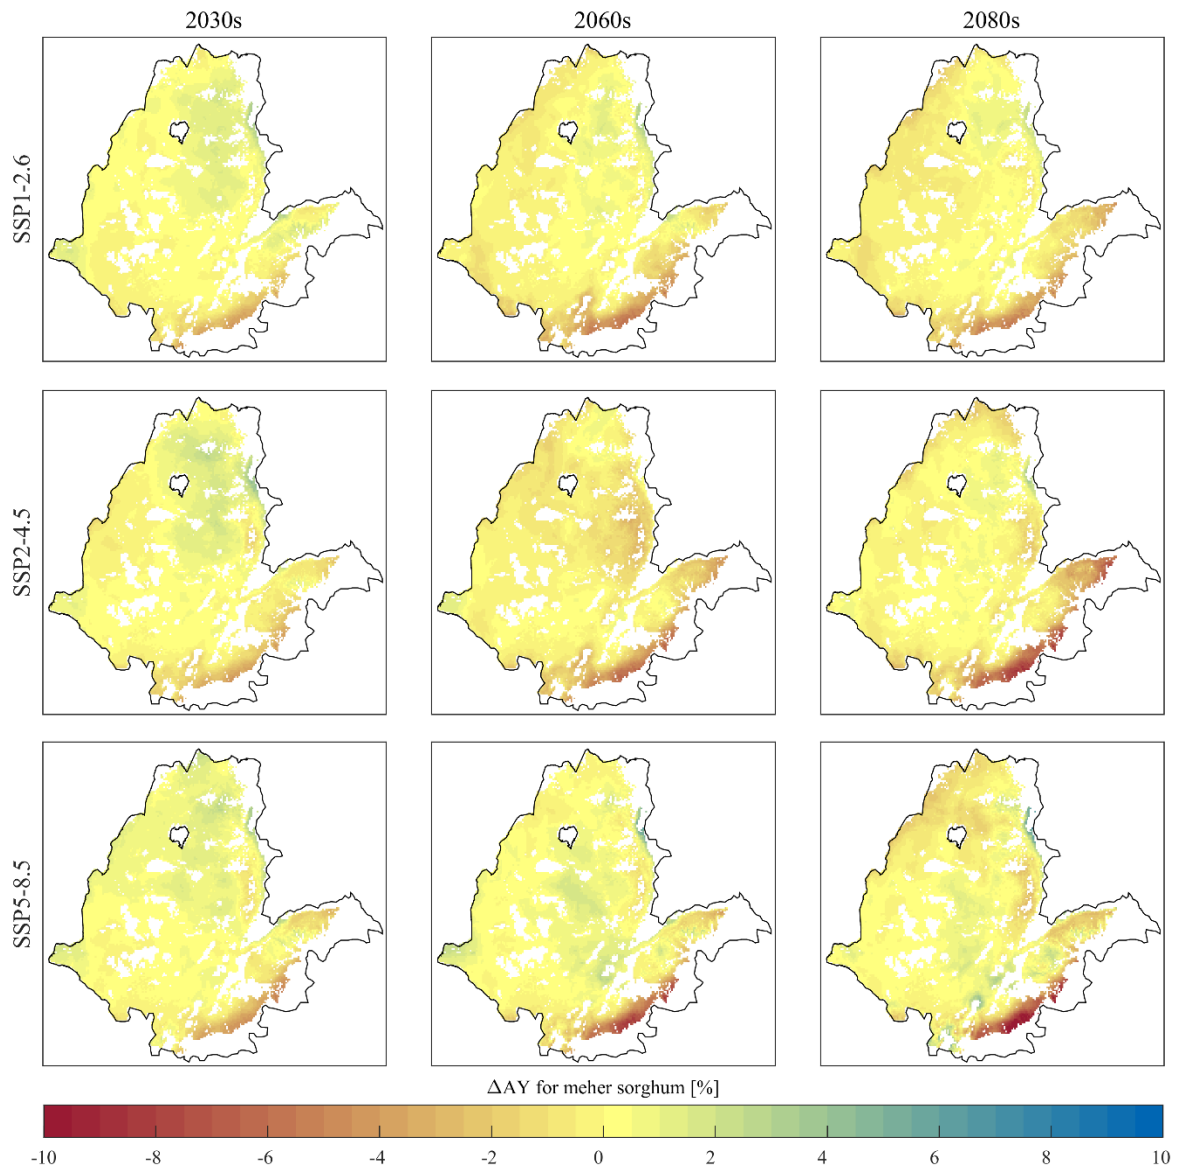

Figure S5: The same as Fig. S3, but for sorghum

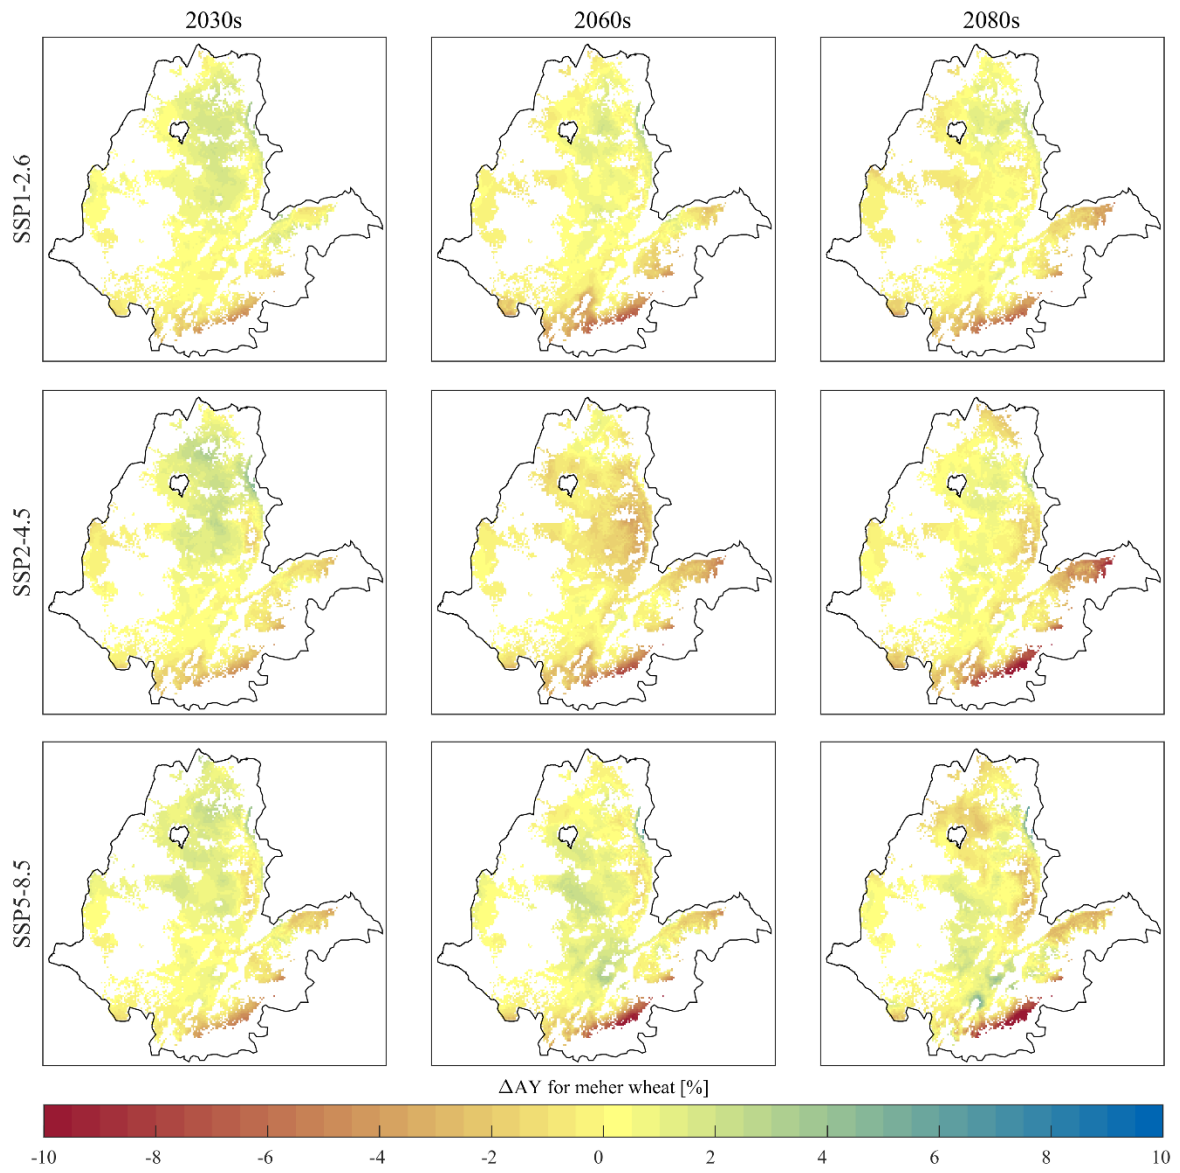

Figure S6: The same as Fig. S3, but for wheat

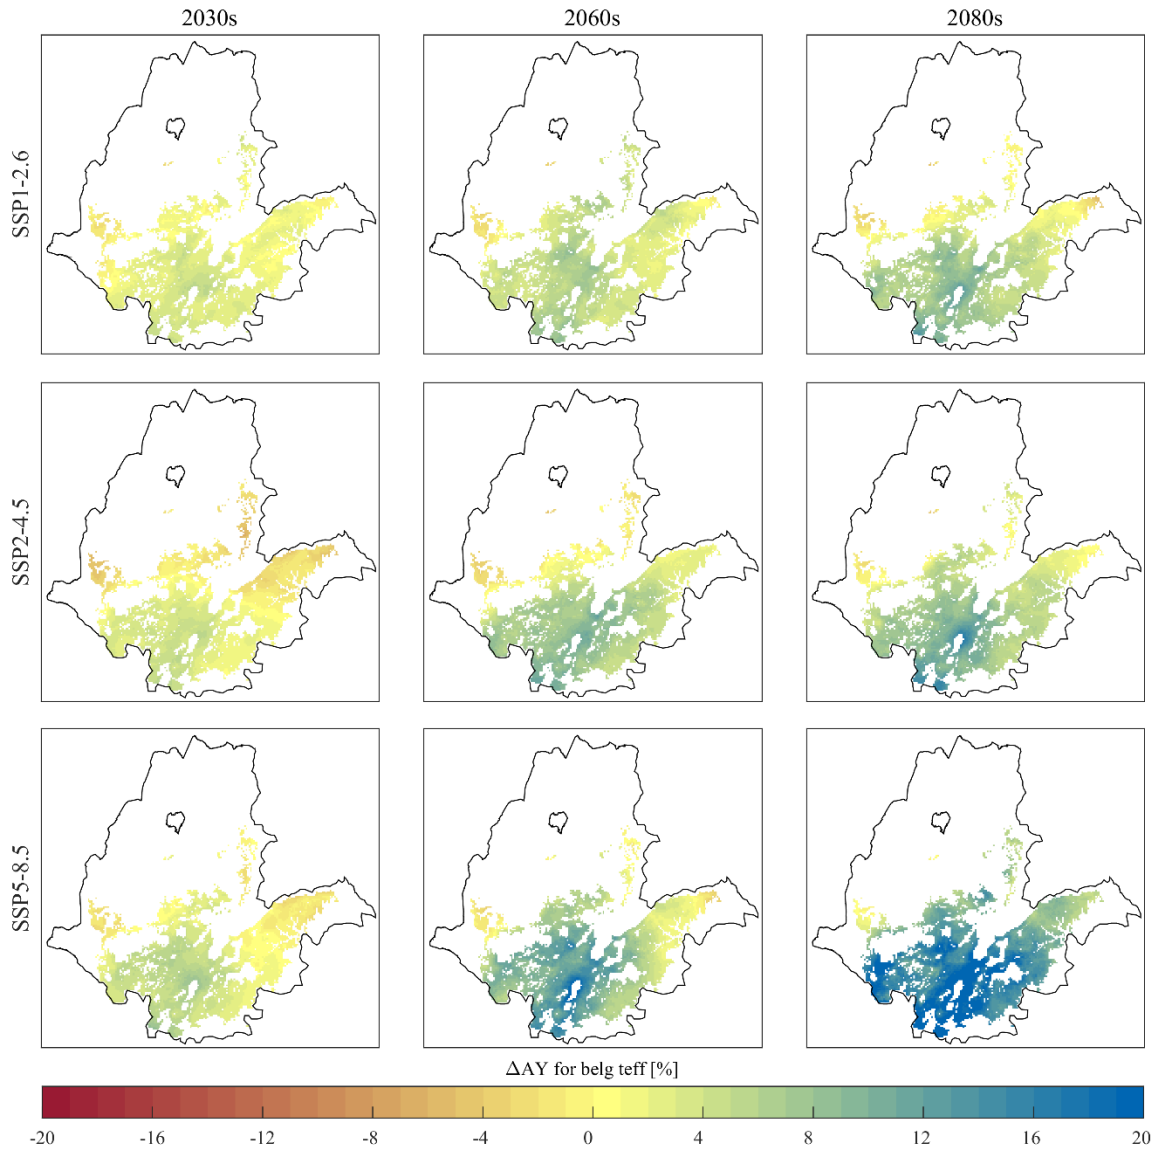

Figure S7: Projected changes in Belg water-limited attainable yield (AY) for teff under the SSP1-2.6, SSP2-4.5, and SSP5-8.5. The RFA region was masked using cropland suitability maps (Wakjira et al., under review) to restrict the analysis to areas potentially suitable for each crop. The non-producing areas during both seasons were also masked out following the Atlas of Ethiopian Rural Socioeconomy (IFPRI and CSA, 2006).

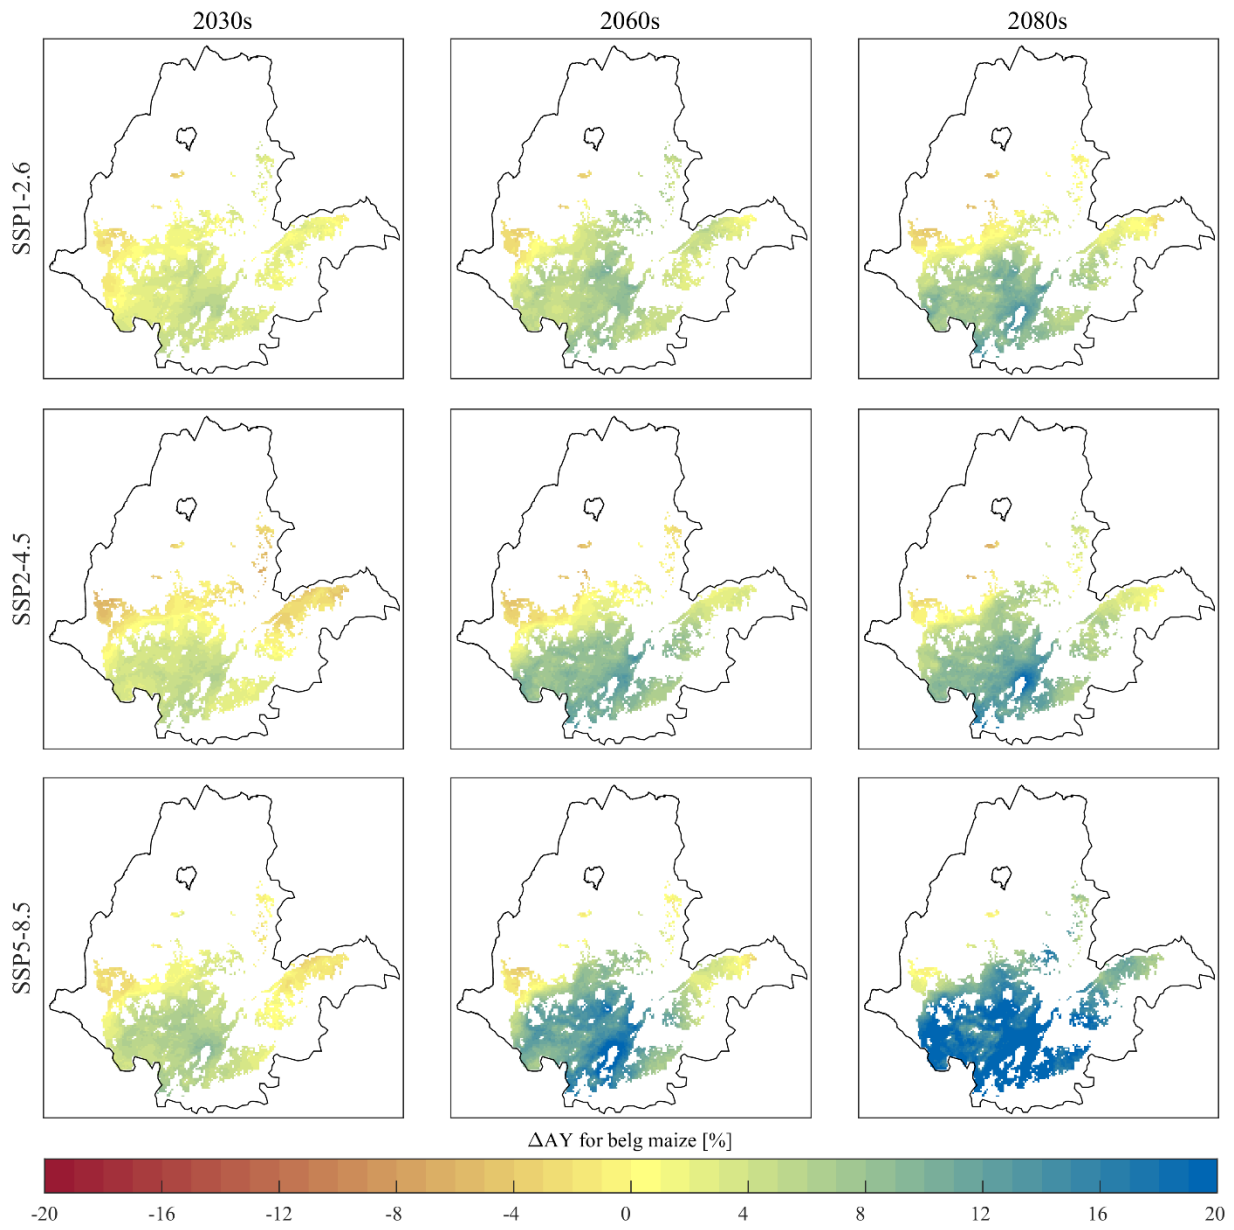

Figure S8: The same as Fig. S7, but for maize

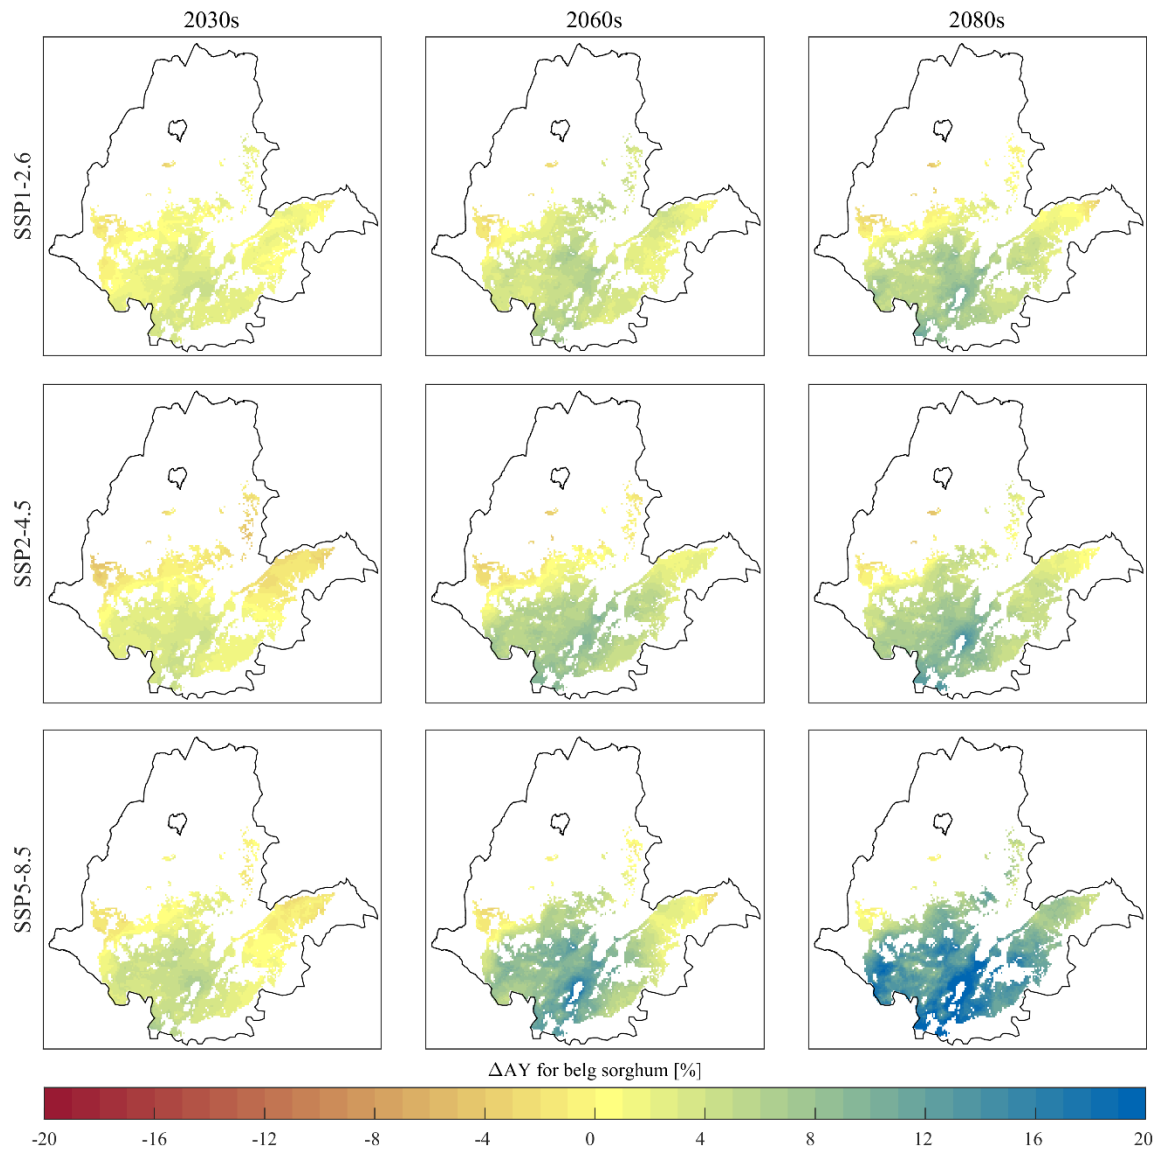

Figure S9: The same as Fig. S7, but for sorghum

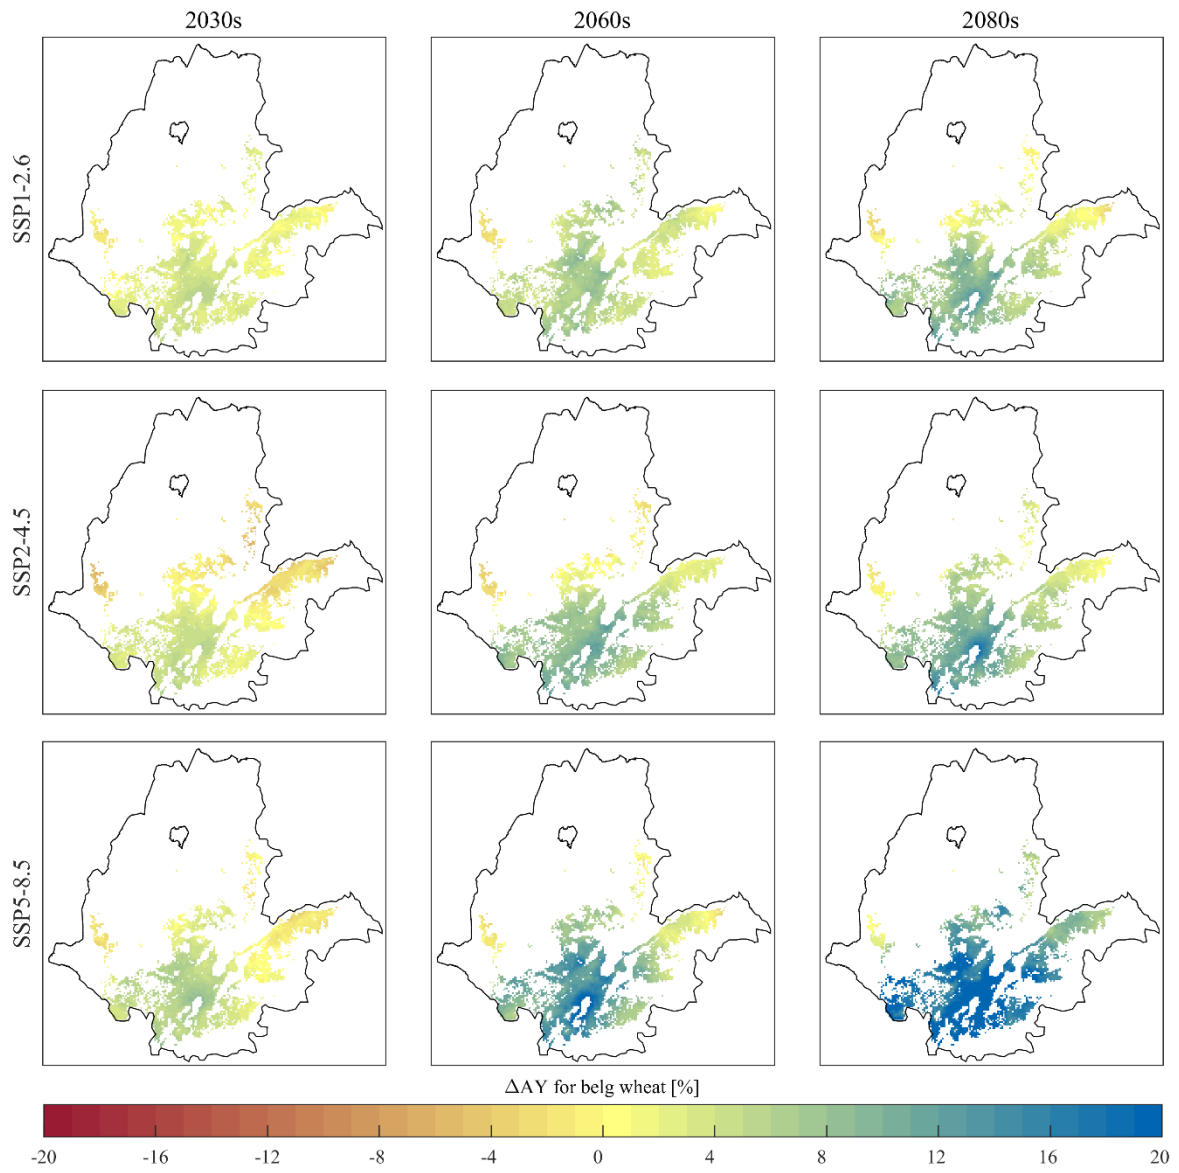

Figure S10: The same as Fig. S7, but for wheat

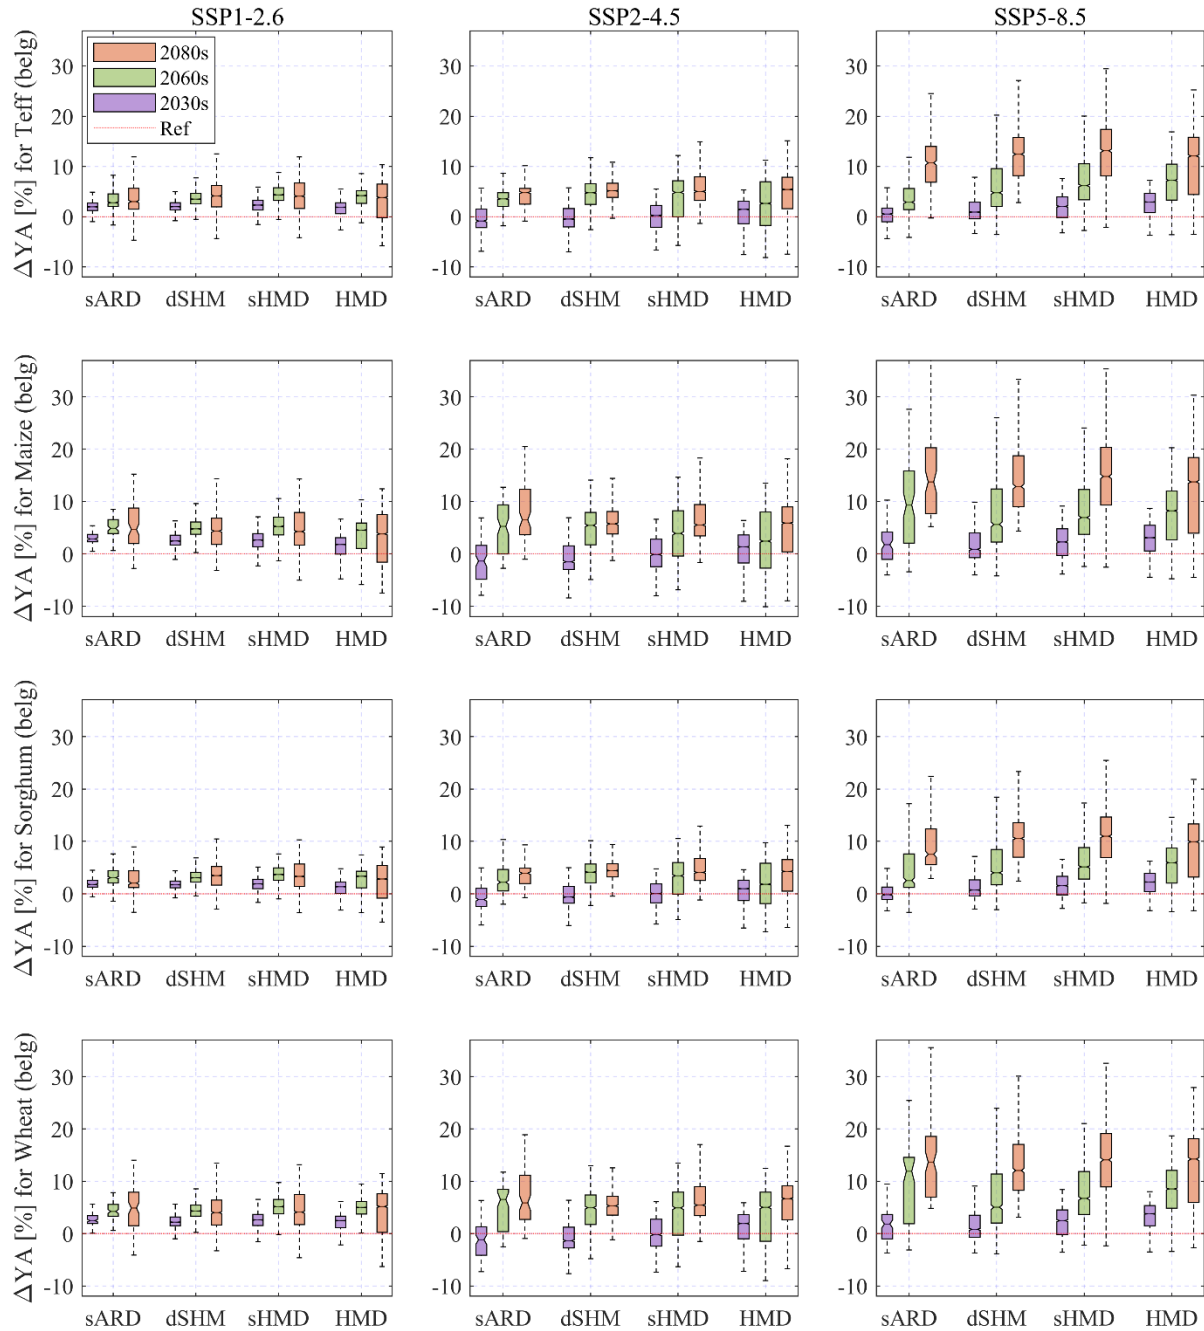

Figure 11: Boxplots of the projected changes in water-limited yields (AY) of the four major cereal crops produced in Ethiopia in different climatic regimes under the three SSPs during the three future periods, during the Belg growing season. Each boxplot represents the distribution of AY changes within Belg-producing areas for all grid cells in the respective climatic regime. Outlier values have been excluded.



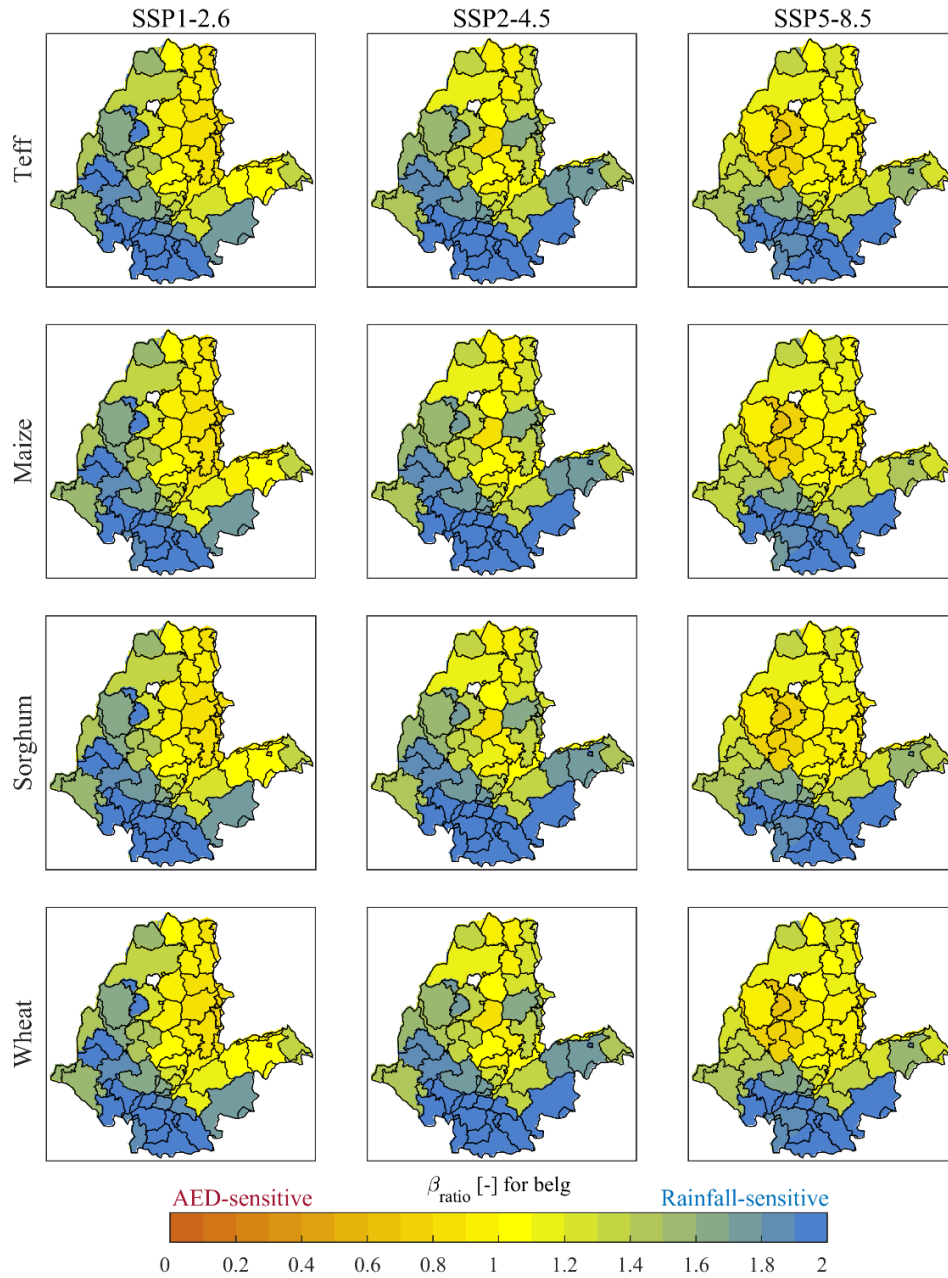

Figure S12: Area-averaged relative sensitivity ( $\beta_{ratio}$ ) of water-limited attainable yields (AY) to rainfall and atmospheric evaporative demand (AED) for the Belg growing season at the administrative zone level under the low, intermediate, and high emission scenarios for teff, maize, sorghum, and wheat. The mapped values represent the average of  $\beta_{ratio}$  of all grid cells within each zone, and all three future periods. The short names of the 62 administrative zones within the RFA region of Ethiopia are indicated in Fig. 1. The long names are listed in Table S1 of the supplementary material.



## References

- Abebe, B. A.: Modeling the Effect of Climate and Land Use Change on the Water Resources in Northern Ethiopia: The Case of Suluh River Basin. [online] Available from: <https://books.google.com.my/books?id=61LuoQEACAAJ>, 2014.
- Abiyu, A. and Alamirew, T.: Assessment of stage-wise deficit furrow irrigation application on maize production at Koga irrigation scheme, Blue Nile River Basin, Ethiopia, *Assessment*, 6(21), 21–29, 2015.
- Adimassu, Z., Mekonnen, K., Yirga, C. and Kessler, A.: Effect of soil bunds on runoff, soil and nutrient losses, and crop yield in the central highlands of Ethiopia, *L. Degrad. Dev.*, 25(6), 554–564, doi:10.1002/ldr.2182, 2014.
- Adimassu, Z., Alemu, G. and Tamene, L.: Effects of tillage and crop residue management on runoff, soil loss and crop yield in the Humid Highlands of Ethiopia, *Agric. Syst.*, 168(August 2017), 11–18, doi:10.1016/j.agsy.2018.10.007, 2019.
- Admasu, R., Tadesse, M. and Shimbir, T.: Effect of Growth Stage Moisture Stress on Maize ( *Zea Mays L.* ) Yield and Water Use Efficiency at West Wellaga , Ethiopia, *J. Biol. Agric. Healthc.*, 7(23), 98–103, 2017.
- Amare, T., Zegeye, A. D., Yitafere, B., Steenhuis, T. S., Hurni, H. and Zeleke, G.: Combined effect of soil bund with biological soil and water conservation measures in the northwestern Ethiopian highlands, *Ecohydrol. Hydrobiol.*, 14(3), 192–199, doi:10.1016/j.ecohyd.2014.07.002, 2014.
- Andrews, M. B., Ridley, J. K., Wood, R. A., Andrews, T., Blockley, E. W., Booth, B., Burke, E., Dittus, A. J., Florek, P., Gray, L. J., Haddad, S., Hardiman, S. C., Hermanson, L., Hodson, D., Hogan, E., Jones, G. S., Knight, J. R., Kuhlbrodt, T., Misios, S., Mizielinski, M. S., Ringer, M. A., Robson, J. and Sutton, R. T.: Historical Simulations With HadGEM3-GC3.1 for CMIP6, *J. Adv. Model. Earth Syst.*, 12(6), 1–34, doi:10.1029/2019MS001995, 2020.
- Bao, Y., Song, Z. and Qiao, F.: FIO-ESM Version 2.0: Model Description and Evaluation, *J. Geophys. Res. Ocean.*, 125(6), 1–21, doi:10.1029/2019JC016036, 2020.
- Bi, D., Dix, M., Marsland, S., O’farrell, S., Sullivan, A., Bodman, R., Law, R., Harman, I., Srbinovsky, J., Rashid, H. A., Dobrohotoff, P., Mackallah, C., Yan, H., Hirst, A., Savita, A., Dias, F. B., Woodhouse, M., Fiedler, R. and Heerdegen, A.: Configuration and spin-up of ACCESS-CM2, the new generation Australian Community Climate and Earth System Simulator Coupled Model, *J. South. Hemisph. Earth Syst. Sci.*, 70(1), 225–251, doi:10.1071/ES19040, 2020.
- Boucher, O., Servonnat, J., Albright, A. L., Aumont, O., Balkanski, Y., Bastrikov, V., Bekki, S., Bonnet, R., Bony, S., Bopp, L., Braconnot, P., Brockmann, P., Cadule, P., Caubel, A., Cheruy, F., Codron, F., Cozic, A., Cugnet, D., D’Andrea, F., Davini, P., de Lavergne, C., Denvil, S., Deshayes, J., Devilliers, M., Ducharne, A., Dufresne, J. L., Dupont, E., Éthé, C., Fairhead, L., Falletti, L., Flavoni, S., Foujols, M. A., Gardoll, S., Gastineau, G., Ghattas, J., Grandpeix, J. Y., Guenet, B., Guez, L. E., Guilyardi, E., Guimberteau, M., Hauglustaine, D., Hourdin, F., Idelkadi, A., Joussaume, S., Kageyama, M., Khodri, M., Krinner, G., Lebas, N., Levavasseur, G., Lévy, C.,

- Li, L., Lott, F., Lurton, T., Luysaert, S., Madec, G., Madeleine, J. B., Maignan, F., Marchand, M., Marti, O., Mellul, L., Meurdesoif, Y., Mignot, J., Musat, I., Ottlé, C., Peylin, P., Planton, Y., Polcher, J., Rio, C., Rochetin, N., Rousset, C., Sepulchre, P., Sima, A., Swingedouw, D., Thiéblemont, R., Traore, A. K., Vancoppenolle, M., Vial, J., Vialard, J., Viovy, N. and Vuichard, N.: Presentation and Evaluation of the IPSL-CM6A-LR Climate Model, *J. Adv. Model. Earth Syst.*, 12(7), 1–52, doi:10.1029/2019MS002010, 2020.
- Cao, J., Wang, B., Yang, Y. M., Ma, L., Li, J., Sun, B., Bao, Y., He, J., Zhou, X. and Wu, L.: The NUIST Earth System Model (NESM) version 3: Description and preliminary evaluation, *Geosci. Model Dev.*, 11(7), 2975–2993, doi:10.5194/gmd-11-2975-2018, 2018.
- Cherchi, A., Fogli, P. G., Lovato, T., Peano, D., Iovino, D., Gualdi, S., Masina, S., Scoccimarro, E., Materia, S., Bellucci, A. and Navarra, A.: Global Mean Climate and Main Patterns of Variability in the CMCC-CM2 Coupled Model, *J. Adv. Model. Earth Syst.*, 11(1), 185–209, doi:10.1029/2018MS001369, 2019.
- Chinasho, A., Bedadi, B., Lemma, T., Tana, T., Hordofa, T. and Elias, B.: Response of maize to irrigation and blended fertilizer levels for climate smart food production in Wolaita Zone, southern Ethiopia, *J. Agric. Food Res.*, 12(March), 100551, doi:10.1016/j.jafr.2023.100551, 2023.
- Christian, J. R., Denman, K. L., Hayashida, H., Holdsworth, A. M., Lee, W. G., Riche, O. G. J., Shao, A. E., Steiner, N. and Swart, N. C.: Ocean biogeochemistry in the Canadian Earth System Model version 5.0.3: CanESM5 and CanESM5-CanOE, *Geosci. Model Dev.*, 15(11), 4393–4424, doi:10.5194/gmd-15-4393-2022, 2022.
- Collick, A. S., Easton, Z. M., Ashagrie, T., Biruk, B., Tilahun, S., Adgo, E., Awulachew, S. B., Zeleke, G. and Steenhuis, T. S.: A simple semi-distributed water balance model for the Ethiopian highlands, *Hydrol. Process.*, 23, 3718–3727, doi:10.1002/hyp.7517, 2009.
- Danabasoglu, G., Lamarque, J. F., Bacmeister, J., Bailey, D. A., DuVivier, A. K., Edwards, J., Emmons, L. K., Fasullo, J., Garcia, R., Gettelman, A., Hannay, C., Holland, M. M., Large, W. G., Lauritzen, P. H., Lawrence, D. M., Lenaerts, J. T. M., Lindsay, K., Lipscomb, W. H., Mills, M. J., Neale, R., Oleson, K. W., Otto-Bliesner, B., Phillips, A. S., Sacks, W., Tilmes, S., van Kampenhout, L., Vertenstein, M., Bertini, A., Dennis, J., Deser, C., Fischer, C., Fox-Kemper, B., Kay, J. E., Kinnison, D., Kushner, P. J., Larson, V. E., Long, M. C., Mickelson, S., Moore, J. K., Nienhouse, E., Polvani, L., Rasch, P. J. and Strand, W. G.: The Community Earth System Model Version 2 (CESM2), *J. Adv. Model. Earth Syst.*, 12(2), 1–35, doi:10.1029/2019MS001916, 2020.
- David A., R., J., S., Ravi S., N. and Parthasarathi, M.: Current Trends in the Representation of Physical Processes in Weather and Climate Models. [online] Available from: [http://dx.doi.org/10.1007/978-981-13-3396-5\\_4](http://dx.doi.org/10.1007/978-981-13-3396-5_4), 2019.
- Döscher, R., Acosta, M., Alessandri, A., Anthoni, P., Arsouze, T., Bergman, T., Bernardello, R., Boussetta, S., Caron, L. P., Carver, G., Castrillo, M., Catalano, F., Cvijanovic, I., Davini, P., Dekker, E., Doblas-Reyes, F. J., Docquier, D., Echevarria, P., Fladrich, U., Fuentes-Franco, R., Gröger, M., Hardenberg, J. V., Hieronymus, J., Karami, M. P., Keskinen, J. P., Koenigk, T., Makkonen, R., Massonnet, F., Ménégos, M., Miller, P. A., Moreno-Chamarro, E., Nieradzic, L., Van Noije, T., Nolan, P., O'donnell, D., Ollinaho, P., Van Den Oord, G., Ortega,

- P., Prims, O. T., Ramos, A., Reerink, T., Rousset, C., Ruprich-Robert, Y., Le Sager, P., Schmith, T., Schrödner, R., Serva, F., Sicardi, V., Sloth Madsen, M., Smith, B., Tian, T., Tourigny, E., Uotila, P., Vancoppenolle, M., Wang, S., Wårlind, D., Willén, U., Wyser, K., Yang, S., Yepes-Arbós, X. and Zhang, Q.: The EC-Earth3 Earth system model for the Coupled Model Intercomparison Project 6, *Geosci. Model Dev.*, 15(7), 2973–3020, doi:10.5194/gmd-15-2973-2022, 2022.
- Dunne, J. P., Horowitz, L. W., Adcroft, A. J., Ginoux, P., Held, I. M., John, J. G., Krasting, J. P., Malyshev, S., Naik, V., Paulot, F., Shevliakova, E., Stock, C. A., Zadeh, N., Balaji, V., Blanton, C., Dunne, K. A., Dupuis, C., Durachta, J., Dussin, R., Gauthier, P. P. G., Griffies, S. M., Guo, H., Hallberg, R. W., Harrison, M., He, J., Hurlin, W., McHugh, C., Menzel, R., Milly, P. C. D., Nikonov, S., Paynter, D. J., Ploshay, J., Radhakrishnan, A., Rand, K., Reichl, B. G., Robinson, T., Schwarzkopf, D. M., Sentman, L. T., Underwood, S., Vahlenkamp, H., Winton, M., Wittenberg, A. T., Wyman, B., Zeng, Y. and Zhao, M.: The GFDL Earth System Model Version 4.1 (GFDL-ESM 4.1): Overall Coupled Model Description and Simulation Characteristics, *J. Adv. Model. Earth Syst.*, 12(11), 1–56, doi:10.1029/2019MS002015, 2020.
- Erkossa, T., Stahr, K. and Gaiser, T.: Effect of different methods of land preparation on runoff, soil and nutrient losses from a Vertisol in the Ethiopian highlands, *Soil Use Manag.*, 21(2), 253–259, doi:10.1111/j.1475-2743.2005.tb00132.x, 2006.
- Furgassa, Z. S.: Zelalem Shelemew Furgassa. The Effect of Deficit Irrigation on Maize Crop Under Conventional Furrow Irrigation in Adami Tulu Central Rift Valley of Ethiopia, *Appl. Eng.*, 1(1), 1–12, doi:10.11648/j.ae.20170101.11, 2017.
- Gebreigziabher, E. T.: Effect of Deficit Irrigation on Yield and Water Use Efficiency of Maize at Selekleka District, Ethiopia, *J. Nepal Agric. Res. Council.*, 6(March), 127–135, doi:10.3126/jnarc.v6i0.28124, 2020.
- Gutjahr, O., Putrasahan, D., Lohmann, K., Jungclaus, J. H., Von Storch, J. S., Brüggemann, N., Haak, H. and Stössel, A.: Max Planck Institute Earth System Model (MPI-ESM1.2) for the High-Resolution Model Intercomparison Project (HighResMIP), *Geosci. Model Dev.*, 12(7), 3241–3281, doi:10.5194/gmd-12-3241-2019, 2019.
- Hajima, T., Watanabe, M., Yamamoto, A., Tatebe, H., Noguchi, M. A., Abe, M., Ohgaito, R., Ito, A., Yamazaki, D., Okajima, H., Ito, A., Takata, K., Ogochi, K., Watanabe, S. and Kawamiya, M.: Development of the MIROC-ES2L Earth system model and the evaluation of biogeochemical processes and feedbacks, *Geosci. Model Dev.*, 13(5), 2197–2244, doi:10.5194/gmd-13-2197-2020, 2020.
- Herweg, K. and Ludi, E.: The performance of selected soil and water conservation measures - Case studies from Ethiopia and Eritrea, *Catena*, 36(1–2), 99–114, doi:10.1016/S0341-8162(99)00004-1, 1999.
- Herweg, K. and Stillhardt, B.: The variability of soil erosion in the highlands of Ethiopia and Eritrea: Average and extreme erosion patterns, Bern, Switzerland., 1999.
- IFPRI and CSA: Atlas of the Ethiopian Rural Economy, International Food Policy Research Institute, Washinton DC.,

2006.

IPCC: Annex II: Models [Gutiérrez, J M., A.-M. Tréguier (eds.)], 2021.

Jemal, K. and Berhanu, S.: Effect of Water Application Methods in Furrow Irrigation Along with Different Types of Mulches on Yield and Water Productivity of Maize (*Zea mays* l.) at Hawassa, Ethiopia, *J. Nat. Sci. Res.*, 10(5), 1–14, doi:10.7176/jnsr/10-5-01, 2020.

Li, L., Yu, Y., Tang, Y., Lin, P., Xie, J., Song, M., Dong, L., Zhou, T., Liu, L., Wang, L., Pu, Y., Chen, X., Chen, L., Xie, Z., Liu, H., Zhang, L., Huang, X., Feng, T., Zheng, W., Xia, K., Liu, H., Liu, J., Wang, Y., Wang, L., Jia, B., Xie, F., Wang, B., Zhao, S., Yu, Z., Zhao, B. and Wei, J.: The Flexible Global Ocean-Atmosphere-Land System Model Grid-Point Version 3 (FGOALS-g3): Description and Evaluation, *J. Adv. Model. Earth Syst.*, 12(9), 1–28, doi:10.1029/2019MS002012, 2020.

Lin, Y., Huang, X., Liang, Y., Qin, Y., Xu, S., Huang, W., Xu, F., Liu, L., Wang, Y., Peng, Y., Wang, L., Xue, W., Fu, H., Zhang, G. J., Wang, B., Li, R., Zhang, C., Lu, H., Yang, K., Luo, Y., Bai, Y., Song, Z., Wang, M., Zhao, W., Zhang, F., Xu, J., Zhao, X., Lu, C., Chen, Y., Luo, Y., Hu, Y., Tang, Q., Chen, D., Yang, G. and Gong, P.: Community Integrated Earth System Model (CIesm): Description and Evaluation, *J. Adv. Model. Earth Syst.*, 12(8), 1–29, doi:10.1029/2019MS002036, 2020.

Lovato, T., Peano, D., Butenschön, M., Materia, S., Iovino, D., Scoccimarro, E., Fogli, P. G., Cherchi, A., Bellucci, A., Gualdi, S., Masina, S. and Navarra, A.: CMIP6 Simulations With the CMCC Earth System Model (CMCC-ESM2), *J. Adv. Model. Earth Syst.*, 14(3), doi:10.1029/2021MS002814, 2022.

Mebrahtu, Y. and Mehamed, A.: Effect of Different Type of Mulching and Furrow Irrigation Methods on Maize (*Zea mays* L.) Yield and Water Productivity at Raya Valley, Northern Ethiopia, *J. Biol. Agric. Healthc.*, 6–13, doi:10.7176/jbah/9-20-02, 2019.

Mehari, H., Bedadi, B. and Abegaz, F.: Maximizing Water Productivity of Maize using Alternate Furrow Irrigation at Clay-loam Soil, Raya valley, Ethiopia, *Int. J. Plant Breed. Crop Sci.*, 7(2), 771–778 [online] Available from: <https://www.researchgate.net/publication/343821511>, 2020.

Mengiste, Y. and Tilahun, K.: Yield and water use efficiency of deficit-irrigated maize in semi-arid region of Ethiopia, *African J. Food, Agric. Nutr. Dev.*, 9(8), 1635–1651, doi:10.4314/ajfand.v9i8.48403, 2009.

Meskelu, E., Tesfaye, H., Debebe, A. and Mohammed, M.: Integrated Effect of Mulching and Furrow Methods on Maize Yield and Water Productivity at Koka, Ethiopia, *Irrig. Drain. Syst. Eng.*, 07(01), 1–7, doi:10.4172/2168-9768.1000207, 2018.

Mintesinot, B., Verplancke, H., Van Ranst, E. and Mitiku, H.: Examining traditional irrigation methods, irrigation scheduling and alternate furrows irrigation on vertisols in northern Ethiopia, *Agric. Water Manag.*, 64(1), 17–27, doi:10.1016/S0378-3774(03)00194-X, 2004.

Seid, Mulugeta M; Narayanan, K.: Effect of Deficit Irrigation on Maize under Conventional, Fixed and Alternate

- Furrow Irrigation Systems at Melkassa, Ethiopia, *Int. J. Eng. Res.*, V4(11), 119–126, doi:10.17577/ijertv4is110178, 2015.
- Seland, Ø., Bentsen, M., Olivié, D., Toniazzo, T., Gjermundsen, A., Graff, L. S., Debernard, J. B., Gupta, A. K., He, Y. C., Kirkevåg, A., Schwinger, J., Tjiputra, J., Schanke Aas, K., Bethke, I., Fan, Y., Griesfeller, J., Grini, A., Guo, C., Ilicak, M., Karset, I. H. H., Landgren, O., Liakka, J., Moseid, K. O., Nummelin, A., Spensberger, C., Tang, H., Zhang, Z., Heinze, C., Iversen, T. and Schulz, M.: Overview of the Norwegian Earth System Model (NorESM2) and key climate response of CMIP6 DECK, historical, and scenario simulations., 2020.
- Sellar, A. A., Jones, C. G., Mulcahy, J. P., Tang, Y., Yool, A., Wiltshire, A., O'Connor, F. M., Stringer, M., Hill, R., Palmieri, J., Woodward, S., de Mora, L., Kuhlbrodt, T., Rumbold, S. T., Kelley, D. I., Ellis, R., Johnson, C. E., Walton, J., Abraham, N. L., Andrews, M. B., Andrews, T., Archibald, A. T., Berthou, S., Burke, E., Blockley, E., Carslaw, K., Dalvi, M., Edwards, J., Folberth, G. A., Gedney, N., Griffiths, P. T., Harper, A. B., Hendry, M. A., Hewitt, A. J., Johnson, B., Jones, A., Jones, C. D., Keeble, J., Liddicoat, S., Morgenstern, O., Parker, R. J., Predoi, V., Robertson, E., Siahann, A., Smith, R. S., Swaminathan, R., Woodhouse, M. T., Zeng, G. and Zerroukat, M.: UKESM1: Description and Evaluation of the U.K. Earth System Model, *J. Adv. Model. Earth Syst.*, 11(12), 4513–4558, doi:10.1029/2019MS001739, 2019.
- Semmler, T., Danilov, S., Gierz, P., Goessling, H. F., Hegewald, J., Hinrichs, C., Koldunov, N., Khosravi, N., Mu, L., Rackow, T., Sein, D. V., Sidorenko, D., Wang, Q. and Jung, T.: Simulations for CMIP6 With the AWI Climate Model AWI-CM-1-1, *J. Adv. Model. Earth Syst.*, 12(9), 1–34, doi:10.1029/2019MS002009, 2020.
- Setu, T., Legese, T., Teklie, G. and Gebeyhu, B.: Effect of furrow irrigation systems and irrigation levels on maize agronomy and water use efficiency in Arba Minch, Southern, Ethiopia, *Heliyon*, 9(7), e17833, doi:10.1016/j.heliyon.2023.e17833, 2023.
- Tatebe, H., Ogura, T., Nitta, T., Komuro, Y., Ogochi, K., Takemura, T., Sudo, K., Sekiguchi, M., Abe, M., Saito, F., Chikira, M., Watanabe, S., Mori, M., Hirota, N., Kawatani, Y., Mochizuki, T., Yoshimura, K., Takata, K., O'Ishi, R., Yamazaki, D., Suzuki, T., Kurogi, M., Kataoka, T., Watanabe, M. and Kimoto, M.: Description and basic evaluation of simulated mean state, internal variability, and climate sensitivity in MIROC6, *Geosci. Model Dev.*, 12(7), 2727–2765, doi:10.5194/gmd-12-2727-2019, 2019.
- Teso, E., Alamirew, T. and Olumana, M.: Predicting Runoff Yield using SWAT Model and Evaluation of Boru Dodota Spate Irrigation Scheme , Arsi Zone , Southeastern Ethiopia. East Shoa Zone Irrigation Development Authority, Thesis, Adama, Ethiopia., , 95–113, 2010.
- Tibebe, D. and Bewket, W.: Surface runoff and soil erosion estimation using the SWAT model in the Keleta Watershed, Ethiopia, *L. Degrad. Dev.*, 22(6), 551–564, doi:10.1002/ldr.1034, 2011.
- Tumsa, B. C., Kenea, G. and Tola, B.: The application of SWAT+ model to quantify the impacts of sensitive LULC changes on water balance in Guder catchment, Oromia, Ethiopia, *Heliyon*, 8(12), e12569, doi:10.1016/j.heliyon.2022.e12569, 2022.

- Voldoire, A., Saint-Martin, D., Sénési, S., Decharme, B., Alias, A., Chevallier, M., Colin, J., Guérémy, J. F., Michou, M., Moine, M. P., Nabat, P., Roehrig, R., Salas y Méliá, D., Sférian, R., Valcke, S., Beau, I., Belamari, S., Berthet, S., Cassou, C., Cattiaux, J., Deshayes, J., Douville, H., Ethé, C., Franchistéguy, L., Geoffroy, O., Lévy, C., Madec, G., Meurdesoif, Y., Msadek, R., Ribes, A., Sanchez-Gomez, E., Terray, L. and Waldman, R.: Evaluation of CMIP6 DECK Experiments With CNRM-CM6-1, *J. Adv. Model. Earth Syst.*, 11(7), 2177–2213, doi:10.1029/2019MS001683, 2019.
- Volodin, E. M., Mortikov, E. V., Kostykin, S. V., Galin, V. Y., Lykossov, V. N., Gritsun, A. S., Diansky, N. A., Gusev, A. V., Iakovlev, N. G., Shestakova, A. A. and Emelina, S. V.: Simulation of the modern climate using the INM-CM48 climate model, *Russ. J. Numer. Anal. Math. Model.*, 33(6), 367–374, doi:10.1515/rnam-2018-0032, 2018.
- Wagesho, N., Jain, M. K. and Goel, N. K.: Effect of Climate Change on Runoff Generation: Application to Rift Valley Lakes Basin of Ethiopia, *J. Hydrol. Eng.*, 18(8), 1048–1063, doi:10.1061/(asce)he.1943-5584.0000647, 2013.
- Wang, Y. C., Hsu, H. H., Chen, C. A., Tseng, W. L., Hsu, P. C., Lin, C. W., Chen, Y. L., Jiang, L. C., Lee, Y. C., Liang, H. C., Chang, W. M., Lee, W. L. and Shiu, C. J.: Performance of the Taiwan Earth System Model in Simulating Climate Variability Compared With Observations and CMIP6 Model Simulations, *J. Adv. Model. Earth Syst.*, 13(7), 1–28, doi:10.1029/2020MS002353, 2021.
- Welderufael, W. A., Le Roux, P. A. L. and Hensley, M.: Quantifying rainfall-runoff relationships on the Dera Calcic Fluvic Regosol ecotope in Ethiopia, *Agric. Water Manag.*, 95(11), 1223–1232, doi:10.1016/j.agwat.2008.04.007, 2008.
- Wu, T., Lu, Y., Fang, Y., Xin, X., Li, L., Li, W., Jie, W., Zhang, J., Liu, Y., Zhang, L., Zhang, F., Zhang, Y., Wu, F., Li, J., Chu, M., Wang, Z., Shi, X., Liu, X., Wei, M., Huang, A., Zhang, Y. and Liu, X.: The Beijing Climate Center Climate System Model (BCC-CSM): The main progress from CMIP5 to CMIP6, *Geosci. Model Dev.*, 12(4), 1573–1600, doi:10.5194/gmd-12-1573-2019, 2019.
- Zelege, Z. A.: Effect of Different Levels of Supplementary Irrigation on Yield and Yield Component of Maize (*zea mays* L) at Tepppi, South West Ethiopia, *Int. J. Res. Stud. Agric. Sci.*, 6(11), 4–9, doi:10.20431/2454-6224.0611002, 2020.
